# Supplementary material
Source: Springer Nature journal article supplement (https://www.springermedizin.de/resource/supplementary/12936_2008_728_MOESM2_ESM.pdf/9548104)

B

## NT-proCNP

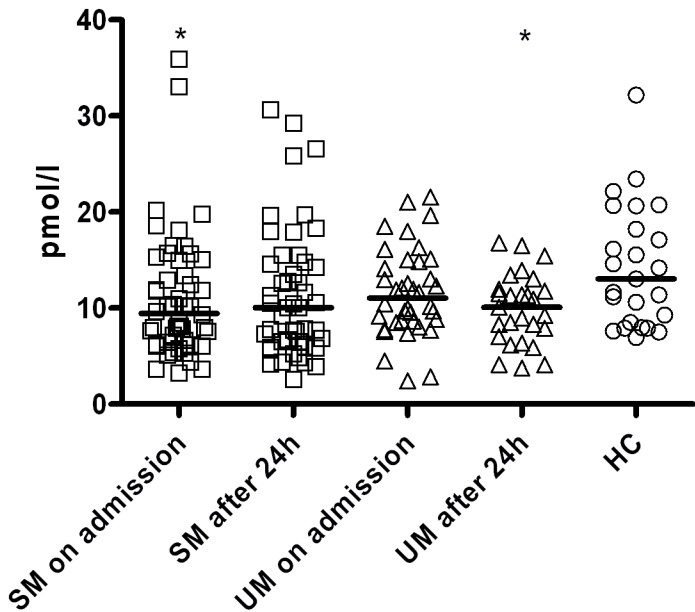

Supplement: MOESM2 [file 9548104]
